# Supplementary material for: Technical Note: Can ozone be used to calibrate aerosol photoacoustic spectrometers?
Source: Copernicus journal article supplement (doi:10.5194/amt-2018-197), 2018-07-17
Supplement: Supplementary file [file amt-2018-197-RC1-supplement.pdf]

Review of ‘Technical Note: Can ozone be used to calibrate aerosol photoacoustic spectrometers?’, by Fischer and Smith, 2018.

## Summary and General Comments

Photoacoustic spectrometers (PAS) require an accurate calibration for subsequent measurements of absorption. Fischer and Smith add to an ongoing discussion concerning the accuracy of PAS calibrations with ozone for applications pertaining to aerosol absorption measurements at laser wavelengths in the visible spectrum. To put this work in context, numerous researchers have used O<sub>3</sub> to calibrate PAS for aerosol absorption applications. However, Bluvshstein *et al.* reported a factor of two discrepancy between their O<sub>3</sub> calibration and that performed with an aerosol (nigrosin dye) calibrant at a PAS laser wavelength of 405 nm.<sup>1</sup> Meanwhile, a subsequent paper by Davies *et al.* reports excellent agreement between an O<sub>3</sub> calibration and that attained using nigrosin dye at multiple PAS laser wavelengths,<sup>2</sup> including the same 405 nm wavelength reported in the Bluvshstein *et al.* work. Bluvshstein *et al.* could not ascertain the source of their calibration discrepancy for using an O<sub>3</sub> calibrant and, as the current authors’ state, further investigation into the accuracy of O<sub>3</sub> calibrations of PAS is warranted. Fischer and Smith first assess the impact of photodissociation at a 532 nm wavelength on the measured PAS response and then investigate how PAS sensitivity factor depends on the mole fraction of O<sub>2</sub> ( $x_{O_2}$ ) in the bath gas. In a pure N<sub>2</sub> bath gas, the PAS response is reduced by 5% when a continuous output 532 nm laser irradiates the gas sample simultaneous to a PAS modulation laser of 662 nm wavelength, while this loss in PAS response is negated by adding O<sub>2</sub> to the bath gas even at small  $x_{O_2} = 0.05$  concentrations. Notably, the PAS sensitivity factor is measured at 532, 662 and 780 nm with variation in the O<sub>2</sub> and N<sub>2</sub> mole fractions in the bath gas. The PAS sensitivity factor increases with  $x_{O_2}$ , approaching a plateau at  $x_{O_2} > 0.2$  and is in near-exact agreement with an NO<sub>2</sub> and nigrosin aerosol calibration for  $x_{O_2} = 1$ . However, the PAS sensitivity of the O<sub>3</sub> calibration for  $x_{O_2}$  close to zero is almost a factor of 3 smaller than that of the NO<sub>2</sub> calibration and is attributed to N<sub>2</sub> being very inefficient (compared to O<sub>2</sub>) at converting the energy of excited O<sub>3</sub> to thermal energy through collisional relaxation. Ultimately, this work does not resolve fully the discrepancies between the Bluvshstein *et al.* and Davies *et al.* studies, but is a new and important contribution to the ongoing discussion of O<sub>3</sub>-based PAS calibration, raising the important consideration of bath gas composition. Moreover, Atmospheric Measurement Techniques is a suitable location for this work. Therefore, I recommend the publication of this Technical Note after the following comments have been addressed.

## Specific comments

Page 1 line 18: The authors highlight the work of Bluvshstein *et al.* and Davies *et al.* in the abstract as partly motivating the current study. Therefore, the authors should summarise how the current work may reconcile these two studies, if at all, at the end of the abstract. As discussed further below, the authors incorrectly state in their conclusions that both the Bluvshstein *et al.* and Davies *et al.* studies use a bath gas of 10% O<sub>2</sub> in N<sub>2</sub>; while this is the case for the Bluvshstein study, the Davies study is for ozone injected into ambient air (25% O<sub>2</sub> in N<sub>2</sub>). These key differences in bath gas composition may partly account for calibration discrepancies between the two studies.

Page 1 line 25: Some readers may not be familiar with a ‘multipass enhancement cell’. The authors should make clear at this early stage what is meant by ‘multipass’ (i.e. multiple reflections of the excitation laser beam through the sample), although it is acknowledged that specific details of the multipass optical cell is given on page 3 line 11 – page 4 line 1.

Page 2 line 1: ‘...recent works exploring its validity have come to contradictory conclusions’ should emphasise that these works were for visible laser wavelengths, i.e. ‘...recent works exploring its validity at visible wavelengths have come to contradictory conclusions’.

Page 2 line 2: ‘...discrepancy between ozone calibrations and particle-based calibrations’. The authors should state that this study was at a PAS laser wavelength of 405 nm only.

Page 2 line 16: ‘Most commonly, this...’. ‘This’ is ambiguous and perhaps should read, ‘Most commonly, this sensitivity factor...’.

Page 2 line 25: Replace ‘...light absorbing aerosols’ with ‘...size selected light absorbing aerosols’.

Page 2 line 27 - 28: Replace ‘when they performed a calibration with ozone’ with ‘when they performed a calibration with ozone at a laser wavelength of 405 nm’.

Page 2 line 29: Add after ‘Mie theory’, ‘at laser wavelengths of 405, 514 and 658 nm’.

Page 2 line 32: The authors should state here: ‘However, we note that the O<sub>3</sub> calibrations performed by Bluvshstein *et al.* were in a bath gas composed of 90% N<sub>2</sub> and 10% O<sub>2</sub>, while the calibrations of Davies *et al.* were performed in a bath gas of ~75% N<sub>2</sub> and 25% O<sub>2</sub> (with an ozonated oxygen flow added to ambient air).’

Page 3 line 3 – 4: ‘...observe a much lower sensitivity with ozone calibrations.’ This is a particular strong statement, in light of the authors’ results, to suggest the sensitivity is much lower. The statistically-significant lower sensitivity occurs only when  $x_{O_2} < 0.2$ . Indeed, the O<sub>3</sub> calibration agrees near-exactly with that using NO<sub>2</sub> and aerosol-based calibrations when  $x_{O_2}$  approaches one.

Page 4 line 20: For the purposes of future work on calibrations by other researchers, further experimental details should be given here. Such details include the pressure and temperature of the sample in the PAS cell. Was the NO<sub>2</sub>-laden N<sub>2</sub> pushed or pulled through the sample line? What was the total flow rate through the spectrometers? What was the 662 nm laser power, as measured by the photodiode?

Page 4 line 29: Again, further details should be given here. What powers did the lasers have, as measured by photodiode, during measurements? This quantity is very important given the photolysis observed by the authors. What was the pressure and temperature of the sample in the PAS cell? Was the O<sub>3</sub>-laden sample pushed or pulled through the PAS and CRD? What was the total flow rate through the spectrometers?

Page 5 line 7: What is the particle cut diameter for a 0.57 millimetre orifice? Moreover, is 0.57 mm a diameter or radius?

Page 6 lines 11-13: Here, it is important to note that (i) the O<sub>3</sub> calibrations were only done at 532 and 662 nm, with the 406 nm PAS signal (which is of most relevance to the Bluvshstein study) showing, presumably, very little response to the O<sub>3</sub> concentrations generated. (ii) The calibration coefficient quoted is that for the fit through both the 532 and 662 nm calibration data.

Page 6 line 17: The sensitivity here is the average of 532, 662 and 780 nm data. It would be useful to have the calibrations for the individual wavelengths. Indeed, the 662 nm calibration in Figure 2 appears to agree with the sensitivity of the NO<sub>2</sub> calibration, while the 532 nm sensitivity is lower.

Page 6 line 28: ‘it can be convenient to calibrate in air...’. Emphasise here that this is exactly the case for the Davies *et al.* study. I think it is important to remind the reader of the Bluvshstein and Davies studies to put the current work in context.

Page 6 line 31: The reader is directed to Figure 4A. Why are there two series for 662 nm on this plot? Presumably, one of the series (the light red line) is actually for the 780 nm wavelength?

Page 7 line 11: The reader is now directed to Figure 4B. It is not clear what the different data series are. Please could the authors add a legend.

Page 9 line 2: The authors have now clearly demonstrated a significant impact of bath gas composition on PAS sensitivity. It would be useful at this point to put this result in context with their motivation for this study. The authors should again highlight the differences in O<sub>2</sub> composition for the Bluvshstein (10%) and Davies (25%) studies, and provide estimates of the approximate biases in calibrations that use these bath gas compositions. From the data here, it seems that the biases would be around 17% and 8% for  $x_{O_2}$  values of 0.1 and 0.25, respectively (assuming the PAS sensitivity behaviour at 405 nm is similar to the data measured here at longer visible wavelengths). Therefore, the current study into bath gas effects does not explain fully the factor of two discrepancy reported by Bluvshstein *et al.*, but is expected to be a significant contributor.

Page 9 lines 6 – 7: ‘excited state of the bath gas’ should perhaps read ‘excited state of the analyte’.

Page 10 line 2: ‘as long as it is performed with 100% O<sub>2</sub> as the bath gas.’ This statement seems unjustified as the authors data suggests that PAS sensitivity factors similar to that measured for NO<sub>2</sub> calibrations are found even at  $x_{O_2}$  values of ~0.17 when uncertainties in both the O<sub>3</sub> and NO<sub>2</sub> PAS sensitivities are considered. Certainly, though, the calibration coefficient markedly drops for  $x_{O_2} < 0.1$ .

Page 10 lines 14 – 16: This sentence is not correct. Bluvshstein *et al.* use the values as currently quoted, but Davies *et al.* use an O<sub>3</sub> laden oxygen flow and add to air giving a PAS cell bath gas composition of approximately 25% O<sub>2</sub> and 75% N<sub>2</sub>. These differences in bath gas composition should be stated clearly with estimates of the PAS calibration biases expected from the current study. Clearly, the current study does not completely reconcile the discrepancy.

## References

- 1 N. Bluvshstein, J. M. Flores, Q. He, E. Segre, L. Segev, N. Hong, A. Donohue, J. N. Hilfiker and Y. Rudich, *Atmos. Meas. Tech.*, 2017, **10**, 1203–1213.
- 2 N. W. Davies, M. I. Cotterell, C. Fox, K. Szpek, J. M. Haywood and J. M. Langridge, *Atmos. Meas. Tech.*, 2018, **11**, 2313–2324.
